# Supplementary material for: Vanadyl Sulfate Effects on Systemic Profiles of Metabolic Syndrome in Old Rats with Fructose-Induced Obesity
Source: Int J Endocrinol. 2018 Dec 25;2018:5257216. doi: 10.1155/2018/5257216 (PMC6323508; doi:10.1155/2018/5257216)
Supplement: Supplementary Materials — This file contains the data obtained during 25 weeks of evolution of the metabolic syndrome in Wistar rats used to be treated with vanadyl sulfate (VS). From the first week, the rats with normal diet (ND) received normal food and pure water as a drink, and the rats with high-fructose diet (HFD) received normal food and water with fructose at 15% as drinking water. All rats had ad libitum access to food and drinking water. At week zero, all the young rats (200-240 g) received pure water as a drink. Body weight, food consumption, drinking water consumption, fructose consumption, and calculation of total kilocalories and from each source are indicated weekly. As indicated in the article, vanadyl sulfate effects on systemic profiles of metabolic syndrome in old rats with fructose-induced obesity these rats were reclassified according to their weight at week 28 and treated with VS from week 32 onwards. [file 5257216.f1.xlsx]

## Sheet: 1. Body weight week 1 to 25
Body weight evolution, Rats for Vanadyl Sulphate (grams)						ND= Normal Diet		HFD= High Fructose Diet								16
	Week 1	2	3	4	5		7	8	9	10	11	12	13	14	15	16	17	18	19	20	21	22	23	24	25	26	27	28	29	30	31	32	33	34
ND	225	240	275	285	305	330	375	410	455	455	460	460	470	465	465	470	460	475	480	495	505	505	510	510	515
ND	225	245	270	290	325	335	375	405	450	450	445	450	450	460	460	460	465	470	480	485	490	490	495	510	510
ND	220	245	275	285	310	350	385	420	465	460	465	465	465	470	470	475	480	485	490	500	500	505	500	510	510
ND	225	240	265	285	305	330	380	405	465	470	470	465	465	465	465	460	475	485	490	495	495	495	505	505	505
ND	225	230	260	290	315	330	380	410	455	465	450	455	460	460	455	460	470	485	485	490	495	490	500	510	510
ND	220	235	260	300	320	340	385	410	460	465	460	460	465	470	475	480	480	490	500	515	520	525	535	535	530
Total	1340	1435	1605	1735	1880	2015	2280	2460	2750	2765	2750	2755	2775	2790	2790	2805	2830	2890	2925	2980	3005	3010	3045	3080	3080
mean	223.333	239.167	267.5	289.167	313.333	335.833	380	410	458.333	460.833	458.333	459.167	462.5	465	465	467.5	471.667	481.667	487.5	496.667	500.833	501.667	507.5	513.333	513.333
SD	2.58199	5.84523	6.89202	5.84523	8.16497	8.01041	4.47214	5.47723	6.0553	7.3598	9.30949	5.84523	6.89202	4.47214	7.07107	8.80341	8.16497	7.52773	7.58288	10.328	10.6849	13.2916	14.4049	10.8012	8.75595
ND	230	245	275	285	310	350	385	420	465	460	465	465	465	470	470	475	465	465	465	470	475	480	490	505	515
ND	220	240	265	285	305	330	380	405	460	460	470	465	465	465	465	460	460	460	470	475	470	480	490	490	490
ND	215	230	255	290	315	330	380	405	445	465	455	455	460	460	455	460	470	470	480	480	485	490	500	500	505
ND	230	245	260	300	320	340	385	410	460	465	460	460	465	470	475	480	465	465	465	475	485	490	495	495	510
ND	225	240	275	305	330	345	385	415	450	465	465	470	465	465	470	465	460	455	460	470	485	485	490	495	490
ND	230	245	270	285	310	350	390	415	460	460	455	470	465	465	465	460	470	475	480	480	495	500	515	520	515
Total	1350	1445	1600	1750	1890	2045	2305	2470	2740	2775	2770	2785	2785	2795	2800	2800	2790	2790	2820	2850	2895	2925	2980	3005	3025
mean	225	240.833	266.667	291.667	315	340.833	384.167	411.667	456.667	462.5	461.667	464.167	464.167	465.833	466.667	466.667	465	465	470	475	482.5	487.5	496.667	500.833	504.167
SD	6.32456	5.84523	8.16497	8.75595	8.94427	9.17424	3.76386	6.0553	7.52773	2.73861	6.0553	5.84523	2.04124	3.76386	6.8313	8.75595	4.47214	7.07107	8.3666	4.47214	8.80341	7.58288	9.83192	10.6849	11.583
HFD	225	255	290	325	360	390	445	480	540	575	585	600	615	620	630	635	630	635	635	640	640	640	635	635	635
HFD	215	240	270	305	345	395	430	470	535	555	565	570	570	570	575	575	570	565	570	570	580	585	585	585	595
HFD	230	255	285	325	365	405	440	470	530	550	555	555	560	565	565	570	575	575	580	580	585	595	590	600	610
HFD	225	250	285	320	335	400	440	475	535	560	575	580	590	595	595	595	590	575	585	590	605	600	610	605	600
HFD	225	250	280	315	350	390	425	460	515	545	555	560	560	560	565	565	575	575	585	585	595	600	600	610	610
HFD	220	240	275	320	350	385	420	455	510	545	560	565	570	575	575	580	575	580	575	585	595	595	590	595	590
Total	1340	1490	1685	1910	2105	2365	2600	2810	3165	3330	3395	3430	3465	3485	3505	3520	3515	3505	3530	3550	3600	3615	3610	3630	3640
mean	223.333	248.333	280.833	318.333	350.833	394.167	433.333	468.333	527.5	555	565.833	571.667	577.5	580.833	584.167	586.667	585.833	584.167	588.333	591.667	600	602.5	601.667	605	606.667
SD	5.16398	6.8313	7.3598	7.52773	10.6849	7.3598	9.83192	9.30949	12.145	11.4018	12.0069	16.3299	21.3892	22.6752	24.9833	25.8199	22.6752	25.3804	23.5938	24.6306	21.4476	19.1703	18.619	17.0294	16.0208
HFD	230	255	285	325	365	405	440	470	530	550	555	555	560	565	565	565	570	575	575	580	580	585	595	595	605
HFD	225	250	285	320	335	400	440	475	535	560	575	585	590	595	595	595	595	590	575	585	590	605	600	610	605
HFD	225	245	280	315	350	390	425	460	520	545	555	560	560	560	560	565	565	575	575	585	585	595	600	600	610
HFD	220	245	285	320	350	385	420	455	515	545	560	565	570	575	575	575	580	575	580	575	585	585	585	590	605
HFD	230	250	285	325	360	400	435	470	510	555	570	575	580	620	630	635	630	635	635	630	630	625	625	635	640
HFd	220	240	270	310	335	390	420	450	520	545	550	555	555	570	575	575	570	565	570	570	580	585	585	585	595
Total	1350	1485	1690	1915	2095	2370	2580	2780	3130	3300	3365	3395	3415	3485	3500	3510	3510	3515	3510	3525	3550	3580	3590	3615	3660
mean	225	247.5	281.667	319.167	349.167	395	430	463.333	521.667	550	560.833	565.833	569.167	580.833	583.333	585	585	585.833	585	587.5	591.667	596.667	598.333	602.5	610
SD	4.47214	5.24404	6.0553	5.84523	12.4164	7.74597	9.48683	9.83192	9.30949	6.32456	9.70395	12.0069	13.5708	22.6752	25.8199	26.8328	24.4949	25.3804	24.6982	21.6217	19.1485	16.0208	14.7196	18.097	15.4919
HFD	225	245	280	315	340	390	425	460	515	545	555	560	560	595	595	605	590	575	585	590	605	605	610	605	605
HFD	230	250	285	325	360	400	435	470	530	565	570	575	580	560	565	565	575	575	580	585	595	600	600	600	590
HFD	220	245	285	320	350	385	420	455	515	545	560	565	570	620	625	630	630	625	625	620	620	620	620	620	625
HFD	230	240	270	310	335	390	420	450	520	535	550	555	555	570	575	575	570	565	570	570	580	585	580	585	590
HFD	225	255	280	325	360	390	445	480	540	575	585	605	615	565	565	570	575	575	570	580	585	580	580	590	590
HFD	215	240	275	305	345	395	430	470	530	555	565	570	570	570	575	575	585	580	580	570	580	590	595	600	590
Total	1345	1475	1675	1900	2090	2350	2575	2785	3150	3320	3385	3430	3450	3480	3500	3520	3525	3495	3510	3515	3565	3580	3585	3600	3590
mean	224.167	245.833	279.167	316.667	348.333	391.667	429.167	464.167	525	553.333	564.167	571.667	575	580	583.333	586.667	587.5	582.5	585	585.833	594.167	596.667	597.5	600	598.333
SD	5.84523	5.84523	5.84523	8.16497	10.328	5.16398	9.70395	11.143	10	14.7196	12.4164	17.7951	21.4476	23.0217	23.1661	25.4296	22.0794	21.3892	20.4939	18.5517	15.9426	14.7196	16.0468	12.2474	14.3759
body weight
	1	2	3	4	5	6	7	8	9	10	11	12	13	14	15	16	17	18	19	20	21	22	23	24	25
ND	223.333	239.167	267.5	289.167	313.333	335.833	380	410	458.333	460.833	458.333	459.167	462.5	465	465	467.5	471.667	481.667	487.5	496.667	500.833	501.667	507.5	513.333	513.333
ND	225	240.833	266.667	291.667	315	340.833	384.167	411.667	456.667	462.5	461.667	464.167	464.167	465.833	466.667	466.667	465	465	470	475	482.5	487.5	496.667	500.833	504.167
HFD	223.333	248.333	280.833	318.333	350.833	394.167	433.333	468.333	527.5	555	565.833	571.667	577.5	580.833	584.167	586.667	585.833	584.167	588.333	591.667	600	602.5	601.667	605	606.667
HFD	225	247.5	281.667	319.167	349.167	395	430	463.333	521.667	550	560.833	565.833	569.167	580.833	583.333	585	585	585.833	585	587.5	591.667	596.667	598.333	602.5	610
HFD	224.167	245.833	279.167	316.667	348.333	391.667	429.167	464.167	525	553.333	564.167	571.667	575	580	583.333	586.667	587.5	582.5	585	585.833	594.167	596.667	597.5	600	598.333
SD	2.58199	5.84523	6.89202	5.84523	8.16497	8.01041	4.47214	5.47723	6.0553	7.3598	9.30949	5.84523	6.89202	4.47214	7.07107	8.80341	5.47723	6.0553	7.3598	9.30949	5.84523	6.89202	4.47214	6.89202	4.47214
SD	6.32456	5.84523	8.16497	8.75595	8.94427	9.17424	3.76386	6.0553	7.52773	2.73861	6.0553	5.84523	2.04124	3.76386	6.8313	8.75595	2.73861	6.0553	5.84523	2.04124	3.76386	6.8313	8.75595	6.8313	8.75595
SD	5.16398	6.8313	7.3598	7.52773	10.6849	7.3598	9.83192	9.30949	12.145	11.4018	12.0069	16.3299	21.3892	22.6752	24.9833	25.8199	31.5304	29.2831	27.3404	28.8097	28.4165	27.1416	24.8328	25.8844	24.2212
SD	4.47214	5.24404	6.0553	5.84523	12.4164	7.74597	9.48683	9.83192	9.30949	6.32456	9.70395	12.0069	13.5708	13.6931	12.0069	9.83192	6.89202	6.12372	3.76386	5.16398	6.32456	7.3598	9.70395	6.8313	6.32456
SD	5.84523	5.84523	5.84523	8.16497	10.328	5.16398	9.70395	11.143	10	14.7196	12.4164	17.7951	21.4476	22.3047	23.2379	26.4102	5.16398	10.9545	15.0555	18.0046	17.4404	18.4391	18.0739	15.7056	16.558

## Sheet: Food intake week 0 to 25
Food intake evolution, Rats for Vanadyl Sulphate (g/day)						ND= Normal Diet		HFD= High Fructose Diet									7
	Week 0	1	2	3	4	5	6	7	8	9	10	11	12	13	14	15	7	17	18	19	20	21	22	23	24	25	7	27	28	29	30
ND	22	28	28	28	29	30	28	28	30	32	28	28	30	28	28	30	28	28	30	32	28	28	30	28	30	28
ND	24	26	29	26	32	29	28	30	28	30	28	28	28	30	30	29	28	30	28	30	28	28	28	30	30	30
ND	20	26	27	28	30	27	28	30	30	28	28	27	28	28	30	27	28	30	30	28	28	27	26	28	30	30
ND	22	28	28	29	28	30	30	28	28	30	30	30	30	30	30	30	30	28	28	30	30	30	28	30	30	30
ND	20	28	27	27	28	30	32	30	28	28	30	28	28	28	28	30	32	30	28	28	30	28	28	28	28	28
ND	24	26	27	24	29	29	30	28	30	29	27	27	26	28	30	28	30	28	27	29	27	27	26	28	28	26
g/rat/daily	22	27	27.6667	27	29.3333	29.1667	29.3333	29	29	29.5	28.5	28	28.3333	28.6667	29.3333	29	29.3333	29	28.5	29.5	28.5	28	27.6667	28.6667	29.3333	28.6667
g/6 rats/day	132	162	166	162	176	175	176	174	174	177	171	168	170	172	176	174	176	174	171	177	171	168	166	172	176	172
g/rat/week	154	189	193.667	189	205.333	204.167	205.333	203	203	206.5	199.5	196	198.333	200.667	205.333	203	205.333	203	199.5	206.5	199.5	196	193.667	200.667	205.333	200.667
g/6rats/w	924	1134	1162	1134	1232	1225	1232	1218	1218	1239	1197	1176	1190	1204	1232	1218	1232	1218	1197	1239	1197	1176	1162	1204	1232	1204
sd	1.78885	1.09545	0.816497	1.78885	1.50555	1.16905	1.63299	1.09545	1.09545	1.51658	1.22474	1.09545	1.50555	1.0328	1.0328	1.26491	1.63299	1.09545	1.22474	1.51658	1.22474	1.09545	1.50555	1.0328	1.0328	1.63299
ND	24	25	24	20	25	28	28	30	30	32	28	28	28	29	27	28	28	30	30	32	28	28	28	28	26	27
ND	26	27	26	26	26	25	25	27	28	30	27	27	28	30	30	25	25	27	28	30	27	28	28	30	28	30
ND	20	26	25	26	26	26	28	28	28	28	26	29	30	29	28	26	27	28	28	28	26	29	27	29	28	28
ND	23	23	26	24	25	26	28	30	28	26	28	28	28	27	29	26	28	30	28	26	28	28	28	26	29	29
ND	26	26	25	23	24	24	24	26	27	26	23	27	26	27	29	24	24	26	27	26	25	27	26	27	29	29
ND	22	25	24	25	25	28	26	26	30	27	26	29	27	29	28	27	27	26	30	28	26	28	26	29	28	28
g/rat/daily	23.5	25.3333	25	24	25.1667	26.1667	26.5	27.8333	28.5	28.1667	26.3333	28	27.8333	28.5	28.5	26	26.5	27.8333	28.5	28.3333	26.6667	28	27.1667	28.1667	28	28.5
g/6 rats/day	141	152	150	144	151	157	159	167	171	169	158	168	167	171	171	156	159	167	171	170	160	168	163	169	168	171
g/rat/week	164.5	177.333	175	168	176.167	183.167	185.5	194.833	199.5	197.167	184.333	196	194.833	199.5	199.5	182	185.5	194.833	199.5	198.333	186.667	196	190.167	197.167	196	199.5
g/6rats/w	987	1064	1050	1008	1057	1099	1113	1169	1197	1183	1106	1176	1169	1197	1197	1092	1113	1169	1197	1190	1120	1176	1141	1183	1176	1197
sd	2.34521	1.36626	0.894427	2.28035	0.752773	1.60208	1.76068	1.83485	1.22474	2.40139	1.8619	0.894427	1.32916	1.22474	1.04881	1.41421	1.64317	1.83485	1.22474	2.33809	1.21106	0.632456	0.983192	1.47196	1.09545	1.04881
HFD	26	19	17	14	15	16	14	18	16	17	16	16	17	14	17	16	14	14	16	14	14	16	14	16	17	16
HFD	24	18	16	16	15	15	17	16	17	15	14	17	15	15	15	15	14	12	14	15	14	12	15	12	15	12
HFD	20	20	17	16	16	16	16	17	15	16	16	15	16	16	16	16	16	14	15	16	16	15	16	14	14	16
HFD	24	18	16	14	16	17	15	15	16	15	14	16	15	18	16	17	15	15	12	15	14	16	15	14	14	14
HFD	22	19	15	15	15	14	17	18	17	14	15	17	14	16	14	14	14	16	16	14	15	17	14	16	14	14
HFD	24	18	14	13	15	12	15	16	15	14	14	14	15	17	15	12	14	14	14	14	12	14	14	12	14	12
g/rat/daily	23.3333	18.6667	15.8333	14.6667	15.3333	15	15.6667	16.6667	16	15.1667	14.8333	15.8333	15.3333	16	15.5	15	14.5	14.1667	14.5	14.6667	14.1667	15	14.6667	14	14.6667	14
g/6 rats/day	140	112	95	88	92	90	94	100	96	91	89	95	92	96	93	90	87	85	87	88	85	90	88	84	88	84
g/rat/week	163.333	130.667	110.833	102.667	107.333	105	109.667	116.667	112	106.167	103.833	110.833	107.333	112	108.5	105	101.5	99.1667	101.5	102.667	99.1667	105	102.667	98	102.667	98
g/6rats/w	980	784	665	616	644	630	658	700	672	637	623	665	644	672	651	630	609	595	609	616	595	630	616	588	616	588
sd	2.06559	0.816497	1.16905	1.21106	0.516398	1.78885	1.21106	1.21106	0.894427	1.16905	0.983192	1.16905	1.0328	1.41421	1.04881	1.78885	0.83666	1.32916	1.51658	0.816497	1.32916	1.78885	0.816497	1.78885	1.21106	1.78885
HFD	24	19	18	16	17	17	15	15	16	15	16	16	17	14	14	14	15	15	12	12	12	14	15	14	14	15
HFD	26	16	18	14	18	16	17	14	18	14	15	14	16	16	15	16	17	14	16	14	14	14	16	16	15	14
HFD	24	14	16	14	16	17	16	14	18	16	13	16	14	17	15	17	16	16	16	16	12	16	14	17	18	18
HFD	22	18	16	14	14	14	16	12	18	14	16	17	17	15	16	14	14	12	18	14	16	14	14	12	12	14
HFD	24	19	19	15	16	15	16	16	18	16	17	14	14	15	14	15	16	16	14	13	15	14	14	15	14	14
HFD	20	18	15	14	16	15	16	14	16	14	15	16	16	15	13	15	16	14	15	15	14	16	14	15	13	12
g/rat/daily	23.3333	17.3333	17	14.5	16.1667	15.6667	16	14.1667	17.3333	14.8333	15.3333	15.5	15.6667	15.3333	14.5	15.1667	15.6667	14.5	15.1667	14	13.8333	14.6667	14.5	14.8333	14.3333	14.5
g/6 rats/day	140	104	102	87	97	94	96	85	104	89	92	93	94	92	87	91	94	87	91	84	83	88	87	89	86	87
g/rat/week	163.333	121.333	119	101.5	113.167	109.667	112	99.1667	121.333	103.833	107.333	108.5	109.667	107.333	101.5	106.167	109.667	101.5	106.167	98	96.8333	102.667	101.5	103.833	100.333	101.5
g/6rats/w	980	728	714	609	679	658	672	595	728	623	644	651	1128	644	609	637	658	609	637	588	581	616	1914	623	602	609
sd	2.06559	1.96638	1.54919	0.83666	1.32916	1.21106	0.632456	1.32916	1.0328	0.983192	1.36626	1.22474	1.36626	1.0328	1.04881	1.16905	1.0328	1.51658	2.04124	1.41421	1.60208	1.0328	0.83666	1.7224	2.06559	1.97484
HFD	22	16	17	18	16	15	16	15	16	16	17	15	14	17	14	14	14	16	16	14	15	17	14	16	14	14
HFD	24	14	18	16	17	14	15	14	15	14	16	16	15	16	15	12	14	14	14	14	12	14	14	12	14	12
HFD	24	18	16	18	16	14	18	16	18	16	14	17	15	17	14	14	15	15	12	12	12	14	15	14	14	15
HFD	20	14	14	14	16	16	15	14	16	17	18	15	12	14	15	16	17	14	16	14	14	14	16	16	15	14
HFD	25	15	16	15	16	16	18	16	17	14	14	15	14	14	15	15	14	12	14	15	14	12	15	12	15	12
HFD	26	16	16	15	16	14	16	14	15	16	16	15	16	15	16	16	16	14	15	16	16	15	16	14	14	16
g/rat/daily	23.5	15.5	16.1667	16	16.1667	14.8333	16.3333	14.8333	16.1667	15.5	15.8333	15.5	14.3333	15.5	14.8333	14.5	15	14.1667	14.5	14.1667	13.8333	14.3333	15	14	14.3333	13.8333
g/6 rats/day	141	93	97	96	97	89	98	89	97	93	95	93	86	93	89	87	90	85	87	85	83	86	90	84	86	83
g/rat/week	164.5	108.5	113.167	112	113.167	103.833	114.333	103.833	113.167	108.5	110.833	108.5	100.333	108.5	103.833	101.5	105	99.1667	101.5	99.1667	96.8333	100.333	105	98	100.333	96.8333
g/6rats/w	987	651	679	672	679	623	686	623	679	651	665	651	602	651	623	609	630	595	609	595	581	602	630	588	602	581
sd	2.16795	1.51658	1.32916	1.67332	0.408248	0.983192	1.36626	0.983192	1.16905	1.22474	1.60208	0.83666	1.36626	1.3784	0.752773	1.51658	1.26491	1.32916	1.51658	1.32916	1.60208	1.63299	0.894427	1.78885	0.516398	1.60208
g/rat/week
	0	1	2	3	4	5	6	7	8	9	10	11	12	13	14	15	7	17	18	19	20	21	22	23	24	25
ND	154	189	193.667	189	205.333	204.167	205.333	203	203	206.5	199.5	196	198.333	200.667	205.333	203	205.333	203	199.5	206.5	199.5	196	193.667	200.667	205.333	200.667
ND	164.5	177.333	175	168	176.167	183.167	185.5	194.833	199.5	197.167	184.333	196	194.833	199.5	199.5	182	185.5	194.833	199.5	198.333	186.667	196	190.167	197.167	196	199.5
HFD	163.333	130.667	110.833	102.667	107.333	105	109.667	116.667	112	106.167	103.833	110.833	107.333	112	108.5	105	101.5	99.1667	101.5	102.667	99.1667	105	102.667	98	102.667	98
HFD	163.333	121.333	119	101.5	113.167	109.667	112	99.1667	121.333	103.833	107.333	108.5	109.667	107.333	101.5	106.167	109.667	101.5	106.167	98	96.8333	102.667	101.5	103.833	100.333	101.5
HFD	164.5	108.5	113.167	112	113.167	103.833	114.333	103.833	113.167	108.5	110.833	108.5	100.333	108.5	103.833	101.5	105	99.1667	101.5	99.1667	96.8333	100.333	105	98	100.333	96.8333
sd
ND	1.78885	1.09545	0.816497	1.78885	1.50555	1.16905	1.63299	1.09545	1.09545	1.51658	1.22474	1.09545	1.50555	1.0328	1.0328	1.26491	1.63299	1.09545	1.22474	1.51658	1.22474	1.09545	1.50555	1.0328	1.0328	1.63299
ND	2.34521	1.36626	0.894427	2.28035	0.752773	1.60208	1.76068	1.83485	1.22474	2.40139	1.8619	0.894427	1.32916	1.22474	1.04881	1.41421	1.64317	1.83485	1.22474	2.33809	1.21106	0.632456	0.983192	1.47196	1.09545	1.04881
HFD	2.06559	0.816497	1.16905	1.21106	0.516398	1.78885	1.21106	1.21106	0.894427	1.16905	0.983192	1.16905	1.0328	1.41421	1.04881	1.78885	0.83666	1.32916	1.51658	0.816497	1.32916	1.78885	0.816497	1.78885	1.21106	1.78885
HFD	2.06559	1.96638	1.54919	0.83666	1.32916	1.21106	0.632456	1.32916	1.0328	0.983192	1.36626	1.22474	1.36626	1.0328	1.04881	1.16905	1.0328	1.51658	2.04124	1.41421	1.60208	1.0328	0.83666	1.7224	2.06559	1.97484
HFD	2.16795	1.51658	1.32916	1.67332	0.408248	0.983192	1.36626	0.983192	1.16905	1.22474	1.60208	0.83666	1.36626	1.3784	0.752773	1.51658	1.26491	1.32916	1.51658	1.32916	1.60208	1.63299	0.894427	1.78885	0.516398	1.60208

## Sheet: fructose intake week 0 to 25
Drink intake evolution, Rats for Vanadyl Sulphate (ml/day)						ND= Normal Diet		HFD= High Fructose Diet								7	0	0.15
	Week 0	1	2	3	4	5	6	7	8	9	10	11	12	13	14	15	16	17	18	19	20	21	22	23	24	25	26	27	28	29	30	31	32	33	34	35	36
ND	30	32	34	38	38	38	44	48	50	52	54	50	52	55	60	54	52	54	54	56	55	55	52	48	52	56
ND	26	26	25	32	35	30	34	42	40	44	44	54	56	60	60	55	56	54	54	56	60	60	55	52	50	52
ND	24	24	26	35	36	34	42	38	42	36	42	50	54	53	50	54	58	52	50	54	53	50	54	58	53	56
ND	30	32	28	34	38	44	48	46	48	50	53	56	54	52	52	52	54	53	56	54	52	52	50	54	52	58
ND	34	30	30	34	32	38	40	42	44	48	54	58	55	55	58	54	50	54	54	52	55	58	54	50	55	54
ND	30	33	35	35	34	35	35	36	36	38	36	48	50	52	55	52	50	46	48	50	52	55	52	50	52	50
ml/rat/daily	29	29.5	29.6667	34.6667	35.5	36.5	40.5	42	43.3333	44.6667	47.1667	52.6667	53.5	54.5	55.8333	53.5	53.3333	52.1667	52.6667	53.6667	54.5	55	52.8333	52	52.3333	54.3333
ml/6 rats/day	174	177	178	208	213	219	243	252	260	268	283	316	321	327	335	321	320	313	316	322	327	330	317	312	314	326
ml/rat/week	203	206.5	207.667	242.667	248.5	255.5	283.5	294	303.333	312.667	330.167	368.667	374.5	381.5	390.833	374.5	373.333	365.167	368.667	375.667	381.5	385	369.833	364	366.333	380.333
ml/6rats/w	1218	1239	1246	1456	1491	1533	1701	1764	1820	1876	1981	2212	2247	2289	2345	2247	2240	2191	2212	2254	2289	2310	2219	2184	2198	2282
SD	3.52136	3.67423	4.13118	1.96638	2.34521	4.72229	5.35724	4.5607	5.16398	6.53197	7.60044	3.93277	2.16795	3.01662	4.21505	1.22474	3.26599	3.12517	3.01109	2.33809	3.01662	3.68782	1.83485	3.57771	1.63299	2.94392
	Week 0: pure water were administered to all groups
ND	24	24	26	35	36	34	40	38	42	36	42	44	48	53	50	50	50	52	54	50	53	50	54	54	50	50
ND	30	32	28	34	34	40	40	40	45	40	43	46	44	44	52	52	54	58	56	54	52	52	50	52	52	58
ND	28	30	30	34	32	34	40	42	40	44	44	48	52	50	52	54	50	54	54	52	52	52	54	50	55	54
ND	30	32	34	38	38	38	44	44	46	52	50	50	52	50	52	54	52	54	54	54	55	55	52	54	48	46
ND	26	26	25	32	35	30	34	36	40	40	44	50	46	46	56	52	56	54	54	50	50	55	50	52	50	52
ND	22	25	25	28	28	30	34	36	36	38	36	44	42	48	55	55	54	46	48	50	52	50	52	46	48	50
ml/rat/daily	26.6667	28.1667	28	33.5	33.8333	34.3333	38.6667	39.3333	41.5	41.6667	43.1667	47	47.3333	48.5	52.8333	52.8333	52.6667	53	53.3333	51.6667	52.3333	52.3333	52	51.3333	50.5	51.6667
ml/6 rats/day	160	169	168	201	203	206	232	236	249	250	259	282	284	291	317	317	316	318	320	310	314	314	312	308	303	310
ml/rat/week	186.667	197.167	196	234.5	236.833	240.333	270.667	275.333	290.5	291.667	302.167	329	331.333	339.5	369.833	369.833	368.667	371	373.333	361.667	366.333	366.333	364	359.333	353.5	361.667
ml/6rats/w	1120	1183	1176	1407	1421	1442	1624	1652	1743	1750	1813	1974	1988	2037	2219	2219	2212	2226	2240	2170	2198	2198	2184	2156	2121	2170
SD	3.26599	3.60093	3.52136	3.33167	3.48807	4.08248	3.93277	3.26599	3.67423	5.71548	4.49073	2.75681	4.13118	3.20936	2.2286	1.83485	2.42212	3.94968	2.73252	1.96638	1.63299	2.25093	1.78885	3.01109	2.66458	4.08248
HFD	28	66	66	72	76	80	84	80	85	82	86	88	88	84	85	80	78	74	76	78	74	74	66	64	60	64
HFD	26	62	68	74	74	84	80	84	86	85	88	86	90	86	88	86	86	86	86	88	86	88	86	80	80	76
HFD	30	64	64	72	74	80	84	80	88	84	86	86	86	88	86	84	80	82	80	82	76	70	72	68	62	64
HFD	28	66	68	78	70	82	80	82	88	86	86	86	86	86	84	88	82	80	74	72	70	68	70	68	66	70
HFD	24	64	69	82	76	78	84	78	84	86	80	82	84	86	85	86	80	78	76	70	74	66	62	65	60	60
HFD	26	70	70	80	82	85	85	88	90	88	84	85	82	86	82	80	76	76	70	72	78	75	70	62	62	65
ml/rat/daily	27	65.3333	67.5	76.3333	75.3333	81.5	82.8333	82	86.8333	85.1667	85	85.5	86	86	85	84	80.3333	79.3333	77	77	76.3333	73.5	71	67.8333	65	66.5
ml/6 rats/day	162	392	405	458	452	489	497	492	521	511	510	513	516	516	510	504	482	476	462	462	458	441	426	407	390	399
ml/rat/week	189	457.333	472.5	534.333	527.333	570.5	579.833	574	607.833	596.167	595	598.5	602	602	595	588	562.333	555.333	539	539	534.333	514.5	497	474.833	455	465.5
ml/6rats/w	1134	2744	2835	3206	3164	3423	3479	3444	3647	3577	3570	3591	3612	3612	3570	3528	3374	3332	3234	3234	3206	3087	2982	2849	2730	2793
SD	2.09762	2.73252	2.16795	4.27395	3.93277	2.66458	2.2286	3.57771	2.2286	2.04124	2.75681	1.97484	2.82843	1.26491	2	3.34664	3.4448	4.32049	5.47723	7.01427	5.42832	7.89303	8.17313	6.40052	7.66812	5.64801
HFD	26	64	70	74	76	78	80	84	88	82	84	84	80	85	82	80	76	80	78	74	74	66	64	60	64	74
HFD	30	68	72	68	72	76	76	76	80	84	84	78	84	86	82	80	78	76	70	74	66	62	65	60	60	60
HFD	24	70	68	65	70	74	72	74	74	80	86	84	80	84	80	84	76	70	72	78	75	70	62	62	65	58
HFD	24	66	68	64	68	76	72	76	76	82	82	80	82	80	86	86	80	74	72	70	68	70	68	66	70	60
HFD	26	68	72	67	74	70	80	80	86	80	78	84	78	86	84	88	82	80	84	80	76	76	70	70	74	60
HFD	22	68	65	74	70	72	75	76	78	84	88	82	86	84	84	82	82	80	82	76	70	72	68	62	64	65
ml/rat/daily	25.3333	67.3333	69.1667	68.6667	71.6667	74.3333	75.8333	77.6667	80.3333	82	83.6667	82	81.6667	84.1667	83	83.3333	79	76.6667	76.3333	75.3333	71.5	69.3333	66.1667	63.3333	66.1667	62.8333
ml/6 rats/day	152	404	415	412	430	446	455	466	482	492	502	492	490	505	498	500	474	460	458	452	429	416	397	380	397	377
ml/rat/week	177.333	471.333	484.167	480.667	501.667	520.333	530.833	543.667	562.333	574	585.667	574	571.667	589.167	581	583.333	553	536.667	534.333	527.333	500.5	485.333	463.167	443.333	463.167	439.833
ml/6rats/w	1064	2828	2905	2884	3010	3122	3185	3262	3374	3444	3514	3444	3430	3535	3486	3500	3318	3220	3206	3164	3003	2912	2779	2660	2779	2639
SD	2.73252	2.06559	2.71416	4.36654	2.94392	2.94392	3.60093	3.6697	5.57375	1.78885	3.4448	2.52982	2.94392	2.2286	2.09762	3.26599	2.75681	4.13118	5.85377	3.50238	4.08656	4.84424	2.99444	3.93277	4.99667	5.94699
HFD	24	60	64	70	74	72	76	80	80	84	84	82	84	84	82	84	84	76	80	76	80	78	74	74	66	64
HFD	28	62	70	70	72	74	74	78	84	78	80	84	84	80	74	76	76	72	76	76	70	74	76	70	72	74
HFD	28	60	64	66	68	72	76	80	80	80	84	80	80	84	80	78	86	82	80	82	80	82	76	70	72	68
HFD	32	64	68	70	68	76	76	68	82	76	80	82	82	80	82	80	76	80	80	80	74	72	70	68	70	68
HFD	28	64	64	72	72	74	74	74	74	78	80	80	78	84	78	84	86	82	80	78	76	70	74	66	62	65
HFD	30	62	68	74	75	76	74	80	86	80	80	84	88	82	80	82	85	80	80	76	70	72	78	75	70	62
ml/rat/daily	28.3333	62	66.3333	70.3333	71.5	74	75	76.6667	81	79.3333	81.3333	82	82.6667	82.3333	79.3333	80.6667	82.1667	78.6667	79.3333	78	75	74.6667	74.6667	70.5	68.6667	66.8333
ml/6 rats/day	170	372	398	422	429	444	450	460	486	476	488	492	496	494	476	484	493	472	476	468	450	448	448	423	412	401
ml/rat/week	198.333	434	464.333	492.333	500.5	518	525	536.667	567	555.333	569.333	574	578.667	576.333	555.333	564.667	575.167	550.667	555.333	546	525	522.667	522.667	493.5	480.667	467.833
ml/6rats/w	1190	2604	2786	2954	3003	3108	3150	3220	3402	3332	3416	3444	3472	3458	3332	3388	3451	3304	3332	3276	3150	3136	3136	2961	2884	2807
SD	2.65832	1.78885	2.65832	2.65832	2.94958	1.78885	1.09545	4.84424	4.14729	2.73252	2.06559	1.78885	3.50238	1.96638	3.01109	3.26599	4.83391	3.93277	1.63299	2.52982	4.51664	4.50185	2.73252	3.44964	3.93277	4.21505
ml/rat/week
	0	1	2	3	4	5	6	7	8	9	10	11	12	13	14	15	16	17	18	19	20	21	22	23	24	25
ND	203	206.5	207.667	242.667	248.5	255.5	283.5	294	303.333	312.667	330.167	368.667	374.5	381.5	390.833	374.5	373.333	365.167	368.667	375.667	381.5	385	369.833	364	366.333	380.333
ND	186.667	197.167	196	234.5	236.833	240.333	270.667	275.333	290.5	291.667	302.167	329	331.333	339.5	369.833	369.833	368.667	371	373.333	361.667	366.333	366.333	364	359.333	353.5	361.667
HFD	189	457.333	472.5	534.333	527.333	570.5	579.833	574	607.833	596.167	595	598.5	602	602	595	588	562.333	555.333	539	539	534.333	514.5	497	474.833	455	439.833
HFD	177.333	471.333	484.167	480.667	501.667	520.333	530.833	543.667	562.333	574	585.667	574	571.667	589.167	581	583.333	553	536.667	534.333	527.333	500.5	485.333	463.167	443.333	463.167	485.333
HFD	198.333	434	464.333	492.333	500.5	518	525	536.667	567	555.333	569.333	574	578.667	576.333	555.333	564.667	575.167	550.667	555.333	546	525	522.667	522.667	493.5	480.667	467.833
SD
ND	3.52136	3.67423	4.13118	1.96638	2.34521	4.72229	5.35724	4.5607	5.16398	6.53197	7.60044	3.93277	2.16795	3.01662	4.21505	1.22474	3.26599	3.12517	3.01109	2.33809	3.01662	3.68782	1.83485	3.57771	1.63299	2.94392
ND	3.26599	3.60093	3.52136	3.33167	3.48807	4.08248	3.93277	3.26599	3.67423	5.71548	4.49073	2.75681	4.13118	3.20936	2.2286	1.83485	2.42212	3.94968	2.73252	1.96638	1.63299	2.25093	1.78885	2.94392	2.66458	4.08248
HFD	2.09762	2.73252	2.16795	4.27395	3.93277	2.66458	2.2286	3.57771	2.2286	2.04124	2.75681	1.97484	2.82843	1.26491	2	3.34664	3.4448	4.32049	5.47723	7.01427	5.42832	7.89303	8.17313	6.40052	7.66812	5.64801
HFD	2.73252	2.06559	2.71416	4.36654	2.94392	2.94392	3.60093	3.6697	5.57375	1.78885	3.4448	2.52982	2.94392	2.2286	2.09762	3.26599	2.75681	4.13118	5.85377	3.50238	4.08656	4.84424	2.99444	3.93277	4.99667	5.94699
HFD	2.65832	1.78885	2.65832	2.65832	2.94958	1.78885	1.09545	4.84424	4.14729	2.73252	2.06559	1.78885	3.50238	1.96638	3.01109	3.26599	4.83391	3.93277	1.63299	2.52982	4.51664	4.50185	2.73252	3.44964	3.93277	4.21505
														7
fructose intake														42
														0.15
					ml/day									0
	Week 0	1	2	3	4	5	6	7	8	9	10	11	12	13	14	15	16	17	18	19	20	21	22	23	24	25
ND	30	32	34	38	38	38	44	48	50	52	54	50	52	55	60	54	52	54	54	56	55	55	52	48	52	56
ND	26	26	25	32	35	30	34	42	40	44	44	54	56	60	60	55	56	54	54	56	60	60	55	52	50	52			ml/rat/week
ND	24	24	26	35	36	34	42	38	42	36	42	50	54	53	50	54	58	52	50	54	53	50	54	58	53	56				0	1	4	8	12	17	21	25
ND	30	32	28	34	38	44	48	46	48	50	53	56	54	52	52	52	54	53	56	54	52	52	50	54	52	58			ND	203	206.5	248.5	303.333	374.5	365.167	385	380.333
ND	34	30	30	34	32	38	40	42	44	48	54	58	55	55	58	54	50	54	54	52	55	58	54	50	55	54			ND	186.667	197.167	236.833	290.5	331.333	371	366.333	361.667
ND	30	33	35	35	34	35	35	36	36	38	36	48	50	52	55	52	50	46	48	50	52	55	52	50	52	50			HFD	189	457.333	527.333	607.833	602	555.333	514.5	439.833
ml/rat/daily	29	29.5	29.6667	34.6667	35.5	36.5	40.5	42	43.3333	44.6667	47.1667	52.6667	53.5	54.5	55.8333	53.5	53.3333	52.1667	52.6667	53.6667	54.5	55	52.8333	52	52.3333	54.3333			HFD	177.333	471.333	501.667	562.333	571.667	536.667	485.333	485.333
ml/6 rats/day	174	177	178	208	213	219	243	252	260	268	283	316	321	327	335	321	320	313	316	322	327	330	317	312	314	326			HFD	198.333	434	500.5	567	578.667	550.667	522.667	467.833
ml/rat/week	203	206.5	207.667	242.667	248.5	255.5	283.5	294	303.333	312.667	330.167	368.667	374.5	381.5	390.833	374.5	373.333	365.167	368.667	375.667	381.5	385	369.833	364	366.333	380.333
ml/6rats/w	1218	1239	1246	1456	1491	1533	1701	1764	1820	1876	1981	2212	2247	2289	2345	2247	2240	2191	2212	2254	2289	2310	2219	2184	2198	2282
g/rat/day	0	0	0	0	0	0	0	0	0	0	0	0	0	0	0	0	0	0	0	0	0	0	0	0	0	0
g/6 rats/day	0	0	0	0	0	0	0	0	0	0	0	0	0	0	0	0	0	0	0	0	0	0	0	0	0	0
g/rat/week	0	0	0	0	0	0	0	0	0	0	0	0	0	0	0	0	0	0	0	0	0	0	0	0	0	0
g/6rats/w	0	0	0	0	0	0	0	0	0	0	0	0	0	0	0	0	0	0	0	0	0	0	0	0	0	0
ND	24	24	26	35	36	34	40	38	42	36	42	44	48	53	50	50	50	52	54	50	53	50	54	54	50	50
ND	30	32	28	34	34	40	40	40	45	40	43	46	44	44	52	52	54	58	56	54	52	52	50	52	52	58
ND	28	30	30	34	32	34	40	42	40	44	44	48	52	50	52	54	50	54	54	52	52	52	54	50	55	54
ND	30	32	34	38	38	38	44	44	46	52	50	50	52	50	52	54	52	54	54	54	55	55	52	48	48	46
ND	26	26	25	32	35	30	34	36	40	40	44	50	46	46	56	52	56	54	54	50	50	55	50	52	50	52
ND	22	25	25	28	28	30	34	36	36	38	36	44	42	48	55	55	54	46	48	50	52	50	52	46	48	50
ml/rat/daily	26.6667	28.1667	28	33.5	33.8333	34.3333	38.6667	39.3333	41.5	41.6667	43.1667	47	47.3333	48.5	52.8333	52.8333	52.6667	53	53.3333	51.6667	52.3333	52.3333	52	50.3333	50.5	51.6667
ml/6 rats/day	160	169	168	201	203	206	232	236	249	250	259	282	284	291	317	317	316	318	320	310	314	314	312	302	303	310
ml/rat/week	186.667	197.167	196	234.5	236.833	240.333	270.667	275.333	290.5	291.667	302.167	329	331.333	339.5	369.833	369.833	368.667	371	373.333	361.667	366.333	366.333	364	352.333	353.5	361.667
ml/6rats/w	1120	1183	1176	1407	1421	1442	1624	1652	1743	1750	1813	1974	1988	2037	2219	2219	2212	2226	2240	2170	2198	2198	2184	2114	2121	2170
g/rat/day	0	0	0	0	0	0	0	0	0	0	0	0	0	0	0	0	0	0	0	0	0	0	0	0	0	0
g/6 rats/day	0	0	0	0	0	0	0	0	0	0	0	0	0	0	0	0	0	0	0	0	0	0	0	0	0	0
g/rat/week	0	0	0	0	0	0	0	0	0	0	0	0	0	0	0	0	0	0	0	0	0	0	0	0	0	0
g/6rats/w	0	0	0	0	0	0	0	0	0	0	0	0	0	0	0	0	0	0	0	0	0	0	0	0	0	0
HFD	28	66	66	72	76	80	84	80	85	82	86	88	88	84	85	80	78	74	76	78	74	74	66	64	60	64
HFD	26	62	68	74	74	84	80	84	86	85	88	86	90	86	88	86	86	86	86	88	86	88	86	80	80	76
HFD	30	64	64	72	74	80	84	80	88	84	86	86	86	88	86	84	80	82	80	82	76	70	72	68	62	64
HFD	28	66	68	78	70	82	80	82	88	86	86	86	86	86	84	88	82	80	74	72	70	68	70	68	66	70
HFD	24	64	69	82	76	78	84	78	84	86	80	82	84	86	85	86	80	78	76	70	74	66	62	65	60	60
HFD	26	70	70	80	82	85	85	88	90	88	84	85	82	86	82	80	76	76	70	72	78	75	70	62	62	65
ml/rat/daily	27	65.3333	67.5	76.3333	75.3333	81.5	82.8333	82	86.8333	85.1667	85	85.5	86	86	85	84	80.3333	79.3333	77	77	76.3333	73.5	71	67.8333	65	66.5
ml/6 rats/day	162	392	405	458	452	489	497	492	521	511	510	513	516	516	510	504	482	476	462	462	458	441	426	407	390	399
ml/rat/week	189	457.333	472.5	534.333	527.333	570.5	579.833	574	607.833	596.167	595	598.5	602	602	595	588	562.333	555.333	539	539	534.333	514.5	497	474.833	455	465.5
ml/6rats/w	1134	2744	2835	3206	3164	3423	3479	3444	3647	3577	3570	3591	3612	3612	3570	3528	3374	3332	3234	3234	3206	3087	2982	2849	2730	2793
g/rat/day	4.05	9.8	10.125	11.45	11.3	12.225	12.425	12.3	13.025	12.775	12.75	12.825	12.9	12.9	12.75	12.6	12.05	11.9	11.55	11.55	11.45	11.025	10.65	10.175	9.75	9.975
g/6 rats/day	24.3	58.8	60.75	68.7	67.8	73.35	74.55	73.8	78.15	76.65	76.5	76.95	77.4	77.4	76.5	75.6	72.3	71.4	69.3	69.3	68.7	66.15	63.9	61.05	58.5	59.85
g/rat/week	28.35	68.6	70.875	80.15	79.1	85.575	86.975	86.1	91.175	89.425	89.25	89.775	90.3	90.3	89.25	88.2	84.35	83.3	80.85	80.85	80.15	77.175	74.55	71.225	68.25	69.825
g/6rats/w	170.1	411.6	425.25	480.9	474.6	513.45	521.85	516.6	547.05	536.55	535.5	538.65	541.8	541.8	535.5	529.2	506.1	499.8	485.1	485.1	480.9	463.05	447.3	427.35	409.5	418.95
HFD	26	64	70	74	76	78	80	84	88	82	84	84	80	85	82	80	76	80	78	74	74	66	64	60	64	74
HFD	30	68	72	68	72	76	76	76	80	84	84	78	84	86	82	80	78	76	70	74	66	62	65	60	60	60
HFD	24	70	68	65	70	74	72	74	74	80	86	84	80	84	80	84	76	70	72	78	75	70	62	62	65	58
HFD	24	66	68	64	68	76	72	76	76	82	82	80	82	80	86	86	80	74	72	70	68	70	68	66	70	60
HFD	26	68	72	67	74	70	80	80	86	80	78	84	78	86	84	88	82	80	84	80	76	76	70	70	74	60
HFD	22	68	65	74	70	72	75	76	78	84	88	82	86	84	84	82	82	80	82	76	70	72	68	62	64	65
ml/rat/daily	25.3333	67.3333	69.1667	68.6667	71.6667	74.3333	75.8333	77.6667	80.3333	82	83.6667	82	81.6667	84.1667	83	83.3333	79	76.6667	76.3333	75.3333	71.5	69.3333	66.1667	63.3333	66.1667	62.8333
ml/6 rats/day	152	404	415	412	430	446	455	466	482	492	502	492	490	505	498	500	474	460	458	452	429	416	397	380	397	377
ml/rat/week	177.333	471.333	484.167	480.667	501.667	520.333	530.833	543.667	562.333	574	585.667	574	571.667	589.167	581	583.333	553	536.667	534.333	527.333	500.5	485.333	463.167	443.333	463.167	439.833
ml/6rats/w	1064	2828	2905	2884	3010	3122	3185	3262	3374	3444	3514	3444	3430	3535	3486	3500	3318	3220	3206	3164	3003	2912	2779	2660	2779	2639
g/rat/day	3.8	10.1	10.375	10.3	10.75	11.15	11.375	11.65	12.05	12.3	12.55	12.3	12.25	12.625	12.45	12.5	11.85	11.5	11.45	11.3	10.725	10.4	9.925	9.5	9.925	9.425
g/6 rats/day	22.8	60.6	62.25	61.8	64.5	66.9	68.25	69.9	72.3	73.8	75.3	73.8	73.5	75.75	74.7	75	71.1	69	68.7	67.8	64.35	62.4	59.55	57	59.55	56.55
g/rat/week	26.6	70.7	72.625	72.1	75.25	78.05	79.625	81.55	84.35	86.1	87.85	86.1	85.75	88.375	87.15	87.5	82.95	80.5	80.15	79.1	75.075	72.8	69.475	66.5	69.475	65.975
g/6rats/w	159.6	424.2	435.75	432.6	451.5	468.3	477.75	489.3	506.1	516.6	527.1	516.6	514.5	530.25	522.9	525	497.7	483	480.9	474.6	450.45	436.8	416.85	399	416.85	395.85
HFD	24	60	64	70	74	72	76	80	80	84	84	82	84	84	82	84	84	76	80	76	80	78	74	74	66	64
HFD	28	62	70	70	72	74	74	78	84	78	80	84	84	80	74	76	76	72	76	76	70	74	76	70	72	74
HFD	28	60	64	66	68	72	76	80	80	80	84	80	80	84	80	78	86	82	80	82	80	82	76	70	72	68
HFD	32	64	68	70	68	76	76	68	82	76	80	82	82	80	82	80	76	80	80	80	74	72	70	68	70	68
HFD	28	64	64	72	72	74	74	74	74	78	80	80	78	84	78	84	86	82	80	78	76	70	74	66	62	65
HFD	30	62	68	74	75	76	74	80	86	80	80	84	88	82	80	82	85	80	80	76	70	72	78	75	70	62
ml/rat/daily	28.3333	62	66.3333	70.3333	71.5	74	75	76.6667	81	79.3333	81.3333	82	82.6667	82.3333	79.3333	80.6667	82.1667	78.6667	79.3333	78	75	74.6667	74.6667	70.5	68.6667	66.8333
ml/6 rats/day	170	372	398	422	429	444	450	460	486	476	488	492	496	494	476	484	493	472	476	468	450	448	448	423	412	401
ml/rat/week	198.333	434	464.333	492.333	500.5	518	525	536.667	567	555.333	569.333	574	578.667	576.333	555.333	564.667	575.167	550.667	555.333	546	525	522.667	522.667	493.5	480.667	467.833
ml/6rats/w	1190	2604	2786	2954	3003	3108	3150	3220	3402	3332	3416	3444	3472	3458	3332	3388	3451	3304	3332	3276	3150	3136	3136	2961	2884	2807
g/rat/day	4.25	9.3	9.95	10.55	10.725	11.1	11.25	11.5	12.15	11.9	12.2	12.3	12.4	12.35	11.9	12.1	12.325	11.8	11.9	11.7	11.25	11.2	11.2	10.575	10.3	10.025
g/6 rats/day	25.5	55.8	59.7	63.3	64.35	66.6	67.5	69	72.9	71.4	73.2	73.8	74.4	74.1	71.4	72.6	73.95	70.8	71.4	70.2	67.5	67.2	67.2	63.45	61.8	60.15
g/rat/week	29.75	65.1	69.65	73.85	75.075	77.7	78.75	80.5	85.05	83.3	85.4	86.1	86.8	86.45	83.3	84.7	86.275	82.6	83.3	81.9	78.75	78.4	78.4	74.025	72.1	70.175
g/6rats/w	178.5	390.6	417.9	443.1	450.45	466.2	472.5	483	510.3	499.8	512.4	516.6	520.8	518.7	499.8	508.2	517.65	3304	499.8	491.4	472.5	470.4	470.4	444.15	432.6	421.05
ml/rat/week
	0	1	2	3	4	5	6	7	8	9	10	11	12	13	14	15	16	17	18	19	20	21	22	23	24	25
ND	0	0	0	0	0	0	0	0	0	0	0	0	0	0	0	0	0	0	0	0	0	0	0	0	0	0
ND	0	0	0	0	0	0	0	0	0	0	0	0	0	0	0	0	0	0	0	0	0	0	0	0	0	0
HFD	0	68.6	70.875	80.15	79.1	85.575	86.975	86.1	91.175	89.425	89.25	89.775	90.3	90.3	89.25	88.2	84.35	83.3	80.85	80.85	80.15	77.175	74.55	71.225	68.25	69.825
HFD	0	70.7	72.625	72.1	75.25	78.05	79.625	81.55	84.35	86.1	87.85	86.1	85.75	88.375	87.15	87.5	82.95	80.5	80.15	79.1	75.075	72.8	69.475	66.5	69.475	65.975
HFD	0	65.1	69.65	73.85	75.075	77.7	78.75	80.5	85.05	83.3	85.4	86.1	86.8	86.45	83.3	84.7	86.275	82.6	83.3	81.9	78.75	78.4	78.4	74.025	72.1	70.175
SD
ND
ND
HFD
HFD
HFD

## Sheet: kcal intake week 0-25 
Calories intake evolution, Rats for Vanadyl Sulphate					ND= Normal Diet	HFD= High Fructose Diet			Food Calories=4.07/g		Fructose calories=4.0/g							4.07	4										4.07	4
	Week 0	1900-01-01	2	3	4	5	6	7	8	9	10	11	12	13	14	15	16	17	18	19	20	21	22	23	24	25
ND
g/rat/daily	22	27	27.6667	27	29.3333	29.1667	29.3333	29	29	29.5	28.5	28	28.3333	28.6667	29.3333	29	29.3333	29	28.5	29.5	28.5	28	27.6667	28.6667	29.3333	28.6667
g/6 rats/day	132	162	166	162	176	175	176	174	174	177	171	168	170	172	176	174	176	174	171	177	171	168	166	172	176	172
g/rat/week	154	189	193.667	189	205.333	204.167	205.333	203	203	206.5	199.5	196	198.333	200.667	205.333	203	205.333	203	199.5	206.5	199.5	196	193.667	200.667	205.333	200.667
g/6rats/week	924	1134	1162	1134	1232	1225	1232	1218	1218	1239	1197	1176	1190	1204	1232	1218	1232	1218	1197	1239	1197	1176	1162	1204	1232	1204
g Fru/rat/week	0	0	0	0	0	0	0	0	0	0	0	0	0	0	0	0	0	0	0	0	0	0	0	0	0	0
Calfood/rat/week	626.78	769.23	788.223	769.23	835.707	830.958	835.707	826.21	826.21	840.455	811.965	797.72	807.217	816.713	835.707	826.21	835.707	826.21	811.965	840.455	811.965	797.72	788.223	816.713	835.707	816.713
CalFru/rat/week	0	0	0	0	0	0	0	0	0	0	0	0	0	0	0	0	0	0	0	0	0	0	0	0	0	0
totalCal/rat/week	626.78	769.23	788.223	769.23	835.707	830.958	835.707	826.21	826.21	840.455	811.965	797.72	807.217	816.713	835.707	826.21	835.707	826.21	811.965	840.455	811.965	797.72	788.223	816.713	835.707	816.713
ND
g/rat/daily	23.5	25.3333	25	24	25.1667	26.1667	26.5	27.8333	28.5	28.1667	26.3333	28	27.8333	28.5	28.5	26	26.5	27.8333	28.5	28.3333	26.6667	28	27.1667	28.1667	28	28.5
g/6 rats/day	141	152	150	144	151	157	159	167	171	169	158	168	167	171	171	156	159	167	171	170	160	168	163	169	168	171
g/rat/week	164.5	177.333	175	168	176.167	183.167	185.5	194.833	199.5	197.167	184.333	196	194.833	199.5	199.5	182	185.5	194.833	199.5	198.333	186.667	196	190.167	197.167	196	199.5
g/6rats/week	987	1064	1050	1008	1057	1099	1113	1169	1197	1183	1106	1176	1169	1197	1197	1092	1113	1169	1197	1190	1120	1176	1141	1183	1176	1197
g Fru/rat/week	0	0	0	0	0	0	0	0	0	0	0	0	0	0	0	0	0	0	0	0	0	0	0	0	0	0
Calfood/rat/week	669.515	721.747	712.25	683.76	716.998	745.488	754.985	792.972	811.965	802.468	750.237	797.72	792.972	811.965	811.965	740.74	754.985	792.972	811.965	807.217	759.733	797.72	773.978	802.468	797.72	811.965
CalFru/rat/week	0	0	0	0	0	0	0	0	0	0	0	0	0	0	0	0	0	0	0	0	0	0	0	0	0	0
totalCal/rat/week	669.515	721.747	712.25	683.76	716.998	745.488	754.985	792.972	811.965	802.468	750.237	797.72	792.972	811.965	811.965	740.74	754.985	792.972	811.965	807.217	759.733	797.72	773.978	802.468	797.72	811.965
HFD
g/rat/daily	23.3333	18.6667	15.8333	14.6667	15.3333	15	15.6667	16.6667	16	15.1667	14.8333	15.8333	15.3333	16	15.5	15	14.5	14.1667	14.5	14.6667	14.1667	15	14.6667	14	14.6667	14
g/6 rats/day	140	112	95	88	92	90	94	100	96	91	89	95	92	96	93	90	87	85	87	88	85	90	88	84	88	84
g/rat/week	163.333	130.667	110.833	102.667	107.333	105	109.667	116.667	112	106.167	103.833	110.833	107.333	112	108.5	105	101.5	99.1667	101.5	102.667	99.1667	105	102.667	98	102.667	98
g/6rats/week	980	784	665	616	644	630	658	700	672	637	623	665	644	672	651	630	609	595	609	616	595	630	616	588	616	588
g Fru/rat/week	0	68.6	70.875	80.15	79.1	85.575	86.975	86.1	91.175	89.425	89.25	89.775	90.3	90.3	89.25	88.2	84.35	83.3	80.85	80.85	80.15	77.175	74.55	71.225	68.25	69.825
Calfood/rat/week	664.767	531.813	451.092	417.853	436.847	427.35	446.343	474.833	455.84	432.098	422.602	451.092	436.847	455.84	441.595	436.847	427.35	446.343	474.833	455.84	432.098	422.602	451.092	436.847	455.84	441.595
CalFru/rat/week	0	274.4	283.5	320.6	316.4	342.3	347.9	344.4	364.7	357.7	357	359.1	361.2	361.2	357	352.8	337.4	333.2	323.4	323.4	320.6	308.7	298.2	284.9	273	279.3
totalCal/rat/week	664.767	806.213	734.592	738.453	753.247	769.65	794.243	819.233	820.54	789.798	779.602	810.192	798.047	817.04	798.595	789.647	764.75	779.543	798.233	779.24	752.698	731.302	749.292	721.747	728.84	720.895
HFD
g/rat/daily	23.3333	17.3333	17	14.5	16.1667	15.6667	16	14.1667	17.3333	14.8333	15.3333	15.5	15.6667	15.3333	14.5	15.1667	15.6667	14.5	15.1667	14	13.8333	14.6667	14.5	14.8333	14.3333	14.5
g/6 rats/day	140	104	102	87	97	94	96	85	104	89	92	93	94	92	87	91	94	87	91	84	83	88	87	89	86	87
g/rat/week	163.333	121.333	119	101.5	113.167	109.667	112	99.1667	121.333	103.833	107.333	108.5	109.667	107.333	101.5	106.167	109.667	101.5	106.167	98	96.8333	102.667	101.5	103.833	100.333	101.5
g/6rats/week	980	728	714	609	679	658	672	595	728	623	644	651	1128	644	609	637	658	609	637	588	581	616	1914	623	602	609
g Fru/rat/week	0	70.7	72.625	72.1	75.25	78.05	79.625	81.55	84.35	86.1	87.85	86.1	85.75	88.375	87.15	87.5	82.95	80.5	80.15	79.1	75.075	72.8	69.475	66.5	69.475	65.975
Calfood/rat/week	664.767	493.827	484.33	413.105	460.588	446.343	455.84	403.608	493.827	422.602	436.847	441.595	446.343	436.847	413.105	432.098	446.343	413.105	432.098	398.86	394.112	417.853	413.105	422.602	408.357	413.105
CalFru/rat/week	0	282.8	290.5	288.4	301	312.2	318.5	326.2	337.4	344.4	351.4	344.4	343	353.5	348.6	350	331.8	322	320.6	316.4	305.555	291.2	277.9	266	277.9	263.9	4.07	4.07
totalCal/rat/week	664.767	776.627	774.83	701.505	761.588	758.543	774.34	729.808	831.227	767.002	788.247	785.995	789.343	790.347	761.705	782.098	778.143	735.105	752.698	715.26	699.667	709.053	691.005	688.602	686.257	677.005
HFD
g/rat/daily	23.5	15.5	16.1667	16	16.1667	14.8333	16.3333	14.8333	16.1667	15.5	15.8333	15.5	14.3333	15.5	14.8333	14.5	15	14.1667	14.5	14.1667	13.8333	14.3333	15	14	14.3333	13.8333
g/6 rats/day	141	93	97	96	97	89	98	89	97	93	95	93	86	93	89	87	90	85	87	85	83	86	90	84	86	83
g/rat/week	164.5	108.5	113.167	112	113.167	103.833	114.333	103.833	113.167	108.5	110.833	108.5	100.333	108.5	103.833	101.5	105	99.1667	101.5	99.1667	96.8333	100.333	105	98	100.333	96.8333
g/6rats/week	987	651	679	672	679	623	686	623	679	651	665	651	602	651	623	609	630	595	609	595	581	602	630	588	602	581
g Fru/rat/week	0	65.1	69.65	73.85	75.075	77.7	78.75	80.5	85.05	83.3	85.4	86.1	86.8	86.45	83.3	84.7	86.275	82.6	83.3	81.9	78.75	78.4	78.4	74.025	72.1	70.175
Calfood/rat/week	669.515	441.595	460.588	455.84	460.588	422.602	465.337	422.602	460.588	441.595	451.092	441.595	408.357	441.595	422.602	413.105	427.35	403.608	413.105	403.608	394.112	408.357	427.35	398.86	408.357	394.112
CalFru/rat/week	0	260.4	278.6	295.4	300.3	310.8	315	322	340.2	333.2	341.6	344.4	347.2	345.8	333.2	338.8	345.1	330.4	333.2	327.6	315	313.6	313.6	296.1	288.4	280.7
totalCal/rat/week	669.515	701.995	739.188	751.24	760.888	733.402	780.337	744.602	800.788	774.795	792.692	785.995	755.557	787.395	755.802	751.905	772.45	734.008	746.305	731.208	709.112	721.957	740.95	694.96	696.757	674.812
Calfood/rat/week
ND	626.78	769.23	788.223	769.23	835.707	830.958	835.707	826.21	826.21	840.455	811.965	797.72	807.217	816.713	835.707	826.21	835.707	826.21	811.965	840.455	811.965	797.72	788.223	816.713	835.707	816.713
ND	669.515	721.747	712.25	683.76	716.998	745.488	754.985	792.972	811.965	802.468	750.237	797.72	792.972	811.965	811.965	740.74	754.985	792.972	811.965	807.217	759.733	797.72	773.978	802.468	797.72	811.965
HFD	664.767	531.813	451.092	417.853	436.847	427.35	446.343	474.833	455.84	432.098	422.602	451.092	436.847	455.84	441.595	436.847	427.35	446.343	474.833	455.84	432.098	422.602	451.092	436.847	455.84	441.595
HFD	664.767	493.827	484.33	413.105	460.588	446.343	455.84	403.608	493.827	422.602	436.847	441.595	446.343	436.847	413.105	432.098	446.343	413.105	432.098	398.86	394.112	417.853	413.105	422.602	408.357	413.105
HFD	669.515	441.595	460.588	455.84	460.588	422.602	465.337	422.602	460.588	441.595	451.092	441.595	408.357	441.595	422.602	413.105	427.35	403.608	413.105	403.608	394.112	408.357	427.35	398.86	408.357	394.112
CalFru/rat/week
ND	0	0	0	0	0	0	0	0	0	0	0	0	0	0	0	0	0	0	0	0	0	0	0	0	0	0
ND	0	0	0	0	0	0	0	0	0	0	0	0	0	0	0	0	0	0	0	0	0	0	0	0	0	0
HFD	0	274.4	283.5	320.6	316.4	342.3	347.9	344.4	364.7	357.7	357	359.1	361.2	361.2	357	352.8	337.4	333.2	323.4	323.4	320.6	308.7	298.2	284.9	273	279.3
HFD	0	282.8	290.5	288.4	301	312.2	318.5	326.2	337.4	344.4	351.4	344.4	343	353.5	348.6	350	331.8	322	320.6	316.4	305.555	291.2	277.9	266	277.9	263.9
HFD	0	260.4	278.6	295.4	300.3	310.8	315	322	340.2	333.2	341.6	344.4	347.2	345.8	333.2	338.8	345.1	330.4	333.2	327.6	315	313.6	313.6	296.1	288.4	280.7
totalCal/rat/week
ND	626.78	769.23	788.223	769.23	835.707	830.958	835.707	826.21	826.21	840.455	811.965	797.72	807.217	816.713	835.707	826.21	835.707	826.21	811.965	840.455	811.965	797.72	788.223	816.713	835.707	816.713
ND	669.515	721.747	712.25	683.76	716.998	745.488	754.985	792.972	811.965	802.468	750.237	797.72	792.972	811.965	811.965	740.74	754.985	792.972	811.965	807.217	759.733	797.72	773.978	802.468	797.72	811.965
HFD	664.767	806.213	734.592	738.453	753.247	769.65	794.243	819.233	820.54	789.798	779.602	810.192	798.047	817.04	798.595	789.647	764.75	779.543	798.233	779.24	752.698	731.302	749.292	721.747	728.84	720.895
HFD	664.767	776.627	774.83	701.505	761.588	758.543	774.34	729.808	831.227	767.002	788.247	785.995	789.343	790.347	761.705	782.098	778.143	735.105	752.698	715.26	699.667	709.053	691.005	688.602	686.257	677.005
HFD	669.515	701.995	739.188	751.24	760.888	733.402	780.337	744.602	800.788	774.795	792.692	785.995	755.557	787.395	755.802	751.905	772.45	734.008	746.305	731.208	709.112	721.957	740.95	694.96	696.757	674.812
Calfood/rat/week
	week 0	1	4	8	12	17	21	25
ND	626.78	769.23	835.707	826.21	807.217	826.21	797.72	816.713
ND	669.515	721.747	716.998	811.965	792.972	792.972	797.72	811.965
HFD	664.767	531.813	436.847	455.84	436.847	446.343	422.602	441.595
HFD	664.767	493.827	460.588	493.827	446.343	413.105	417.853	413.105
HFD	669.515	441.595	460.588	460.588	408.357	403.608	408.357	394.112
CalFru/rat/week
	week 0	1	4	8	12	17	21	25
ND	0	0	0	0	0	0	0	0
ND	0	0	0	0	0	0	0	0
HFD	0	274.4	316.4	364.7	361.2	333.2	308.7	279.3
HFD	0	282.8	301	337.4	343	322	291.2	263.9
HFD	0	260.4	300.3	340.2	347.2	330.4	313.6	280.7
totalCal/rat/week
	week 0	1	4	8	12	17	21	25
ND	626.78	769.23	835.707	826.21	807.217	826.21	797.72	816.713
ND	669.515	721.747	716.998	811.965	792.972	792.972	797.72	811.965
HFD	664.767	806.213	753.247	820.54	798.047	779.543	731.302	720.895
HFD	664.767	776.627	761.588	831.227	789.343	735.105	709.053	677.005
HFD	669.515	701.995	760.888	800.788	755.557	734.008	721.957	674.812
